# Supplementary material
Source: Springer Nature journal article supplement (https://www.springermedizin.de/resource/supplementary/12888_2013_1440_MOESM3_ESM.pdf/9480218)
Supplement: MOESM3 [file 9480218]

**Additional File 3. Summary of All-cause, and Schizophrenia-Related Costs During 12-Month Postindex Period<sup>a</sup>**

|                                                                   | Study Period              |         |             |         |              |         |              |         |              |         |              |         |
|-------------------------------------------------------------------|---------------------------|---------|-------------|---------|--------------|---------|--------------|---------|--------------|---------|--------------|---------|
|                                                                   | 12-Month Postindex Period |         |             |         |              |         |              |         |              |         |              |         |
|                                                                   | 0-60 Days                 |         | 61-120 Days |         | 121-180 Days |         | 181-240 Days |         | 241-300 Days |         | 301-364 Days |         |
| Overall Health Care Costs                                         |                           |         |             |         |              |         |              |         |              |         |              |         |
| Total all-cause health care costs (US \$), mean (SD)              | \$4,514                   | \$5,447 | \$3,738     | \$5,232 | \$3,577      | \$4,663 | \$3,713      | \$5,649 | \$3,726      | \$5,173 | \$3,984      | \$5,468 |
| Total schizophrenia-related health care costs (US \$), mean (SD)  | \$2,708                   | \$3,955 | \$2,102     | \$3,351 | \$2,018      | \$2,998 | \$1,983      | \$3,120 | \$1,957      | \$3,128 | \$2,068      | \$3,073 |
| Pharmacy Costs                                                    |                           |         |             |         |              |         |              |         |              |         |              |         |
| Total pharmacy costs (US \$), mean (SD)                           | \$1,332                   | \$1,222 | \$1,079     | \$1,125 | \$1,083      | \$1,213 | \$1,078      | \$1,190 | \$1,102      | \$1,266 | \$1,194      | \$1,355 |
| Total schizophrenia-related pharmacy costs (US \$), mean (SD)     | \$959                     | \$971   | \$743       | \$865   | \$744        | \$907   | \$742        | \$902   | \$759        | \$921   | \$832        | \$1,007 |
| ED Costs                                                          |                           |         |             |         |              |         |              |         |              |         |              |         |
| Total all-cause ED costs (US \$), mean (SD)                       | \$122                     | \$418   | \$100       | \$355   | \$91         | \$309   | \$95         | \$371   | \$87         | \$337   | \$101        | \$397   |
| Total schizophrenia-related ED costs (US \$), mean (SD)           | \$22                      | \$137   | \$16        | \$106   | \$13         | \$91    | \$12         | \$83    | \$12         | \$107   | \$9          | \$86    |
| Physician Office Costs                                            |                           |         |             |         |              |         |              |         |              |         |              |         |
| Total all-cause office visit costs (US \$), mean (SD)             | \$200                     | \$612   | \$184       | \$622   | \$182        | \$610   | \$170        | \$532   | \$177        | \$659   | \$188        | \$599   |
| Total schizophrenia-related office visit costs (US \$), mean (SD) | \$114                     | \$536   | \$101       | \$522   | \$110        | \$541   | \$99         | \$472   | \$92         | \$449   | \$102        | \$495   |

|                                                                                     | Study Period              |         |             |         |              |         |              |         |              |         |              |         |
|-------------------------------------------------------------------------------------|---------------------------|---------|-------------|---------|--------------|---------|--------------|---------|--------------|---------|--------------|---------|
|                                                                                     | 12-Month Postindex Period |         |             |         |              |         |              |         |              |         |              |         |
|                                                                                     | 0-60 Days                 |         | 61-120 Days |         | 121-180 Days |         | 181-240 Days |         | 241-300 Days |         | 301-364 Days |         |
| Hospital Outpatient Costs                                                           |                           |         |             |         |              |         |              |         |              |         |              |         |
| Total all-cause outpatient visit costs (US \$), mean (SD)                           | \$133                     | \$597   | \$118       | \$549   | \$100        | \$506   | \$101        | \$516   | \$107        | \$580   | \$131        | \$634   |
| Total schizophrenia-related outpatient visit costs (US \$), mean (SD)               | \$50                      | \$400   | \$33        | \$308   | \$25         | \$272   | \$23         | \$273   | \$25         | \$294   | \$21         | \$262   |
| Inpatient Costs                                                                     |                           |         |             |         |              |         |              |         |              |         |              |         |
| Total all-cause inpatient costs (US \$), mean (SD)                                  | \$1,387                   | \$4,147 | \$1,008     | \$3,998 | \$886        | \$3,206 | \$964        | \$4,328 | \$910        | \$3,509 | \$907        | \$3,530 |
| Total schizophrenia-related inpatient costs (US \$), mean (SD)                      | \$978                     | \$3,336 | \$660       | \$2,674 | \$569        | \$2,197 | \$538        | \$2,326 | \$494        | \$2,249 | \$489        | \$2,096 |
| Other Ancillary Care Costs                                                          |                           |         |             |         |              |         |              |         |              |         |              |         |
| Total all-cause other ancillary care encounter costs (US \$), mean (SD)             | \$1,338                   | \$2,593 | \$1,248     | \$2,521 | \$1,236      | \$2,491 | \$1,305      | \$2,756 | \$1,343      | \$2,892 | \$1,464      | \$3,095 |
| Total schizophrenia-related other ancillary care encounter costs (US \$), mean (SD) | \$586                     | \$1,446 | \$549       | \$1,403 | \$556        | \$1,439 | \$569        | \$1,444 | \$576        | \$1,527 | \$614        | \$1,622 |

ED = emergency department; SD = standard deviation; US = United States.

<sup>a</sup> The 12-month period following the index discharge date defines the postindex period.
